# Supplementary material for: Comparison of Sales Income and Research and Development Costs for FDA-Approved Cancer Drugs Sold by Originator Drug Companies
Source: PubMed Central journal article supplement (PMC6324319; doi:10.1001/jamanetworkopen.2018.6875), 2019-01-04
Supplement: jamanetwopen-2-e186875-s001.pdf [file jamanetwopen-2-e186875-s001.pdf]

## Supplementary Online Content

Tay-Teo K, Ilbawi A, Hill SR. Comparison of sales income and research and development costs for FDA-approved cancer drugs sold by originator drug companies. *JAMA Netw Open*. 2019;2(1):e186875. doi:10.1001/jamanetworkopen.2018.6875

**eTable.** Reported and Derived (shaded) Sales Incomes in US Dollar, by Molecule

This supplementary material has been provided by the authors to give readers additional information about their work.

**eTable.** Reported and derived (shaded) sales incomes in US dollar, by molecule

| Nr                        | Medicine name | 1989 | 1990 | 1991 | 1992 | 1993 | 1994 | 1995 | 1996 | 1997  | 1998 | 1999 | 2000 | 2001 | 2002 | 2003 | 2004  | 2005  | 2006  | 2007  | 2008  | 2009  | 2010  | 2011  | 2012  | 2013  | 2014  | 2015  | 2016  | 2017  |       |
|---------------------------|---------------|------|------|------|------|------|------|------|------|-------|------|------|------|------|------|------|-------|-------|-------|-------|-------|-------|-------|-------|-------|-------|-------|-------|-------|-------|-------|
| <b>Medicines included</b> |               |      |      |      |      |      |      |      |      |       |      |      |      |      |      |      |       |       |       |       |       |       |       |       |       |       |       |       |       |       |       |
| 1                         | Abiraterone   |      |      |      |      |      |      |      |      |       |      |      |      |      |      |      |       |       |       |       |       |       |       |       | 30.1  | 96.1  | 16.98 | 22.37 | 22.31 | 22.60 | 25.05 |
| 2                         | Acalabrutinib |      |      |      |      |      |      |      |      |       |      |      |      |      |      |      |       |       |       |       |       |       |       |       |       |       |       |       |       |       | 3.0   |
| 3                         | Aflibercept   |      |      |      |      |      |      |      |      |       |      |      |      |      |      |      |       |       |       |       |       |       |       |       |       | 32.1  | 70.4  | 91.5  | 85.4  | 71.9  | 84.6  |
| 4                         | Alectinib     |      |      |      |      |      |      |      |      |       |      |      |      |      |      |      |       |       |       |       |       |       |       |       |       |       |       |       |       | 18.4  | 36.7  |
| 5                         | Anastrozole   |      |      |      |      |      |      |      | 69.3 | 104.6 | 12.0 | 14.0 | 15.0 | 19.0 | 33.0 | 51.9 | 81.1  | 11.81 | 15.08 | 17.30 | 18.57 | 19.21 | 15.12 | 75.6  | 54.3  | 35.1  | 29.8  | 25.0  | 23.2  | 21.7  |       |
| 6                         | Aprepitant    |      |      |      |      |      |      |      |      |       |      |      |      |      |      |      |       |       | 13.0  | 20.1  | 25.9  | 31.3  | 37.8  | 41.9  | 48.9  | 50.7  | 55.3  | 53.5  | 54.9  | 55.6  |       |
| 7                         | Atezolizumab  |      |      |      |      |      |      |      |      |       |      |      |      |      |      |      |       |       |       |       |       |       |       |       |       |       |       |       |       | 15.9  | 49.4  |
| 8                         | Axitinib      |      |      |      |      |      |      |      |      |       |      |      |      |      |      |      |       |       |       |       |       |       |       |       | 10.0  | 31.9  | 41.0  | 43.0  | 40.1  | 33.9  |       |
| 9                         | Azacitidine   |      |      |      |      |      |      |      |      |       |      |      |      |      |      |      |       |       |       |       | 20.6  | 38.7  | 53.4  | 70.5  | 82.3  | 82.6  | 69.0  | 67.5  | 67.4  | 66.0  |       |
| 10                        | Belinostat    |      |      |      |      |      |      |      |      |       |      |      |      |      |      |      |       |       |       |       |       |       |       |       |       |       |       | 5.0   | 10.1  | 13.4  | 12.4  |
| 11                        | Bendamustine  |      |      |      |      |      |      |      |      |       |      |      |      |      |      |      |       |       |       |       |       |       |       | 9.1   | 40.1  | 43.9  | 40.0  | 34.9  | 33.9  | 41.4  | 64.2  |
| 12                        | Bevacizumab   |      |      |      |      |      |      |      |      |       |      |      |      |      |      |      | 55.5  | 13.37 | 23.62 | 34.21 | 48.07 | 57.18 | 61.94 | 59.59 | 61.45 | 75.01 | 70.05 | 69.48 | 68.86 | 67.89 |       |
| 13                        | Bicalutamide  |      |      |      |      |      |      |      | 12.7 | 17.6  | 24.5 | 34.0 | 43.0 | 56.9 | 64.4 | 85.4 | 10.12 | 11.23 | 12.06 | 13.35 | 12.58 | 84.4  | 57.9  | 55.0  | 45.4  | 37.6  | 32.0  | 26.7  | 24.7  | 21.5  |       |





| Nr | Medicine name            | 1998 | 1999 | 1999 | 1999 | 1999 | 1999 | 1999 | 1996 | 1997 | 1998 | 1999 | 2000 | 2001 | 2002 | 2003 | 2004 | 2005 | 2006 | 2007 | 2008 | 2009 | 2010 | 2011 | 2012 | 2013 | 2014 | 2015 | 2016 | 2017 |      |      |
|----|--------------------------|------|------|------|------|------|------|------|------|------|------|------|------|------|------|------|------|------|------|------|------|------|------|------|------|------|------|------|------|------|------|------|
| 40 | Fulvestrant              |      |      |      |      |      |      |      |      |      |      |      |      |      | 35.0 | 77.0 | 99.0 | 14.0 | 18.0 | 21.0 | 24.0 | 26.0 | 34.0 | 54.0 | 65.0 | 68.0 | 72.0 | 70.0 | 83.0 | 94.0 |      |      |
| 41 | Gefitinib                |      |      |      |      |      |      |      |      |      |      |      |      |      | 67.0 | 8.0  | 9.0  | 22.0 | 38.0 | 27.0 | 23.0 | 23.0 | 26.0 | 29.0 | 39.0 | 55.0 | 61.0 | 64.0 | 62.0 | 54.0 | 51.0 | 52.0 |
| 42 | Gemcitabine              |      |      |      |      |      |      | 11.0 | 17.0 | 30.0 | 45.0 | 55.0 | 72.0 | 87.0 | 10.0 | 12.0 | 13.0 | 14.0 | 15.0 | 17.0 | 13.0 | 11.0 | 45.0 | 15.0 | 10.0 |      |      |      |      |      |      |      |
| 43 | Goserelin                | 8.1  | 1.4  | 1.0  | 2.5  | 3.6  | 4.8  | 52.0 | 57.0 | 62.0 | 68.0 | 73.0 | 72.0 | 79.0 | 86.0 | 91.0 | 10.0 | 10.0 | 11.0 | 11.0 | 10.0 | 11.0 | 11.0 | 10.0 | 99.0 | 92.0 | 81.0 | 81.0 | 73.0 |      |      |      |
| 44 | Granisetron              |      |      |      |      |      |      |      |      |      |      |      | 22.0 | 28.0 | 32.0 | 36.0 | 40.0 | 39.0 | 35.0 | 10.0 |      |      |      |      |      |      |      |      |      |      |      |      |
| 45 | Hpv Quadrivalent Vaccine |      |      |      |      |      |      |      |      |      |      |      |      |      |      |      |      | 23.0 | 14.0 | 14.0 | 11.0 | 98.0 | 12.0 | 16.0 | 18.0 | 17.0 | 19.0 | 21.0 | 23.0 |      |      |      |
| 46 | Ibritumomab Tiuxetan     |      |      |      |      |      |      |      |      |      |      |      |      | 13.0 | 19.0 | 18.0 | 19.0 | 16.0 | 13.0 | 11.0 | 15.0 | 29.0 | 27.0 | 30.0 | 29.0 | 24.0 | 17.0 | 10.0 | 11.0 |      |      |      |
| 47 | Ibrutinib                |      |      |      |      |      |      |      |      |      |      |      |      |      |      |      |      |      |      |      |      |      |      |      |      | 13.0 | 74.0 | 14.0 | 30.0 | 44.0 |      |      |
| 48 | Idelalisib               |      |      |      |      |      |      |      |      |      |      |      |      |      |      |      |      |      |      |      |      |      |      |      |      |      |      |      |      |      |      |      |
| 49 | Imatinib                 |      |      |      |      |      |      |      |      |      |      |      | 15.0 | 61.0 | 11.0 | 16.0 | 21.0 | 25.0 | 30.0 | 36.0 | 39.0 | 42.0 | 46.0 | 46.0 | 46.0 | 47.0 | 46.0 | 33.0 | 19.0 |      |      |      |
| 50 | Ipilimumab               |      |      |      |      |      |      |      |      |      |      |      | 2.0  | 1.0  | 28.0 | 34.0 | 70.0 | 54.0 | 50.0 | 70.0 | 44.0 | 65.0 | 59.0 | 75.0 | 93.0 | 46.0 | 58.0 | 23.0 | 43.0 |      |      |      |
| 51 | Irinotecan               |      |      |      |      |      | 1.0  | 59.0 | 15.0 | 19.0 | 29.0 | 44.0 | 61.0 | 57.0 | 29.0 | 55.0 | 91.0 | 90.0 | 96.0 | 56.0 | 33.0 | 11.0 | 10.0 | 7.0  | 5.0  | 95.0 | 85.0 | 77.0 | 69.0 | 58.0 |      |      |
